## Original Article

**Title:** Cerebrovascular responses to O<sub>2</sub>-CO<sub>2</sub> exchange ratio under brief breath-hold challenge in patients with chronic mild traumatic brain injury

Suk Tak Chan, PhD<sup>1</sup>, Cora Ordway, BA<sup>1</sup>, Ronald J. Calvanio, PhD<sup>2</sup>, Ferdinando S. Buonanno, MD<sup>2</sup>, Bruce R. Rosen, MD, PhD<sup>1</sup>, Kenneth K. Kwong, PhD<sup>1</sup>

<sup>1</sup>Athinoula A. Martinos Center for Biomedical Imaging, Department of Radiology, Massachusetts General Hospital, Charlestown, Massachusetts, United States of America

<sup>2</sup>Department of Neurology, Massachusetts General Hospital, Boston, Massachusetts, United States of America

**Running title:** Breath-hold functional MRI in mild TBI

**Keywords:** O<sub>2</sub>-CO<sub>2</sub> exchange ratio, breath hold challenge, mild traumatic brain injury, functional magnetic resonance imaging

### Authors:

Suk-tak Chan, PhD

Athinoula A. Martinos Center for Biomedical Imaging, Building 149, Thirteenth Street, Room 2301, Charlestown, MA 02129, United States.

Phone: (617) 724-7194

[stchan@mgh.harvard.edu](mailto:stchan@mgh.harvard.edu)

Cora Ordway, BA

Athinoula A. Martinos Center for Biomedical Imaging, Building 149, Thirteenth Street, Room 2301, Charlestown, MA 02129, United States.

[coraeordway@gmail.com](mailto:coraeordway@gmail.com)

Ronald J. Calvanio PhD

Department of Neurology, Massachusetts General Hospital, 55 Fruit Street, Boston, MA 02114, United States.

[rcalvanio@partners.org](mailto:rcalvanio@partners.org)

Ferdinando S. Buonanno MD

Department of Neurology, Massachusetts General Hospital, 55 Fruit Street, Boston, MA 02114, United States.

Phone: (617) 726-8459

[buonanno.ferdinando@mgh.harvard.edu](mailto:buonanno.ferdinando@mgh.harvard.edu)

Bruce R. Rosen MD PhD

Athinoula A. Martinos Center for Biomedical Imaging, Building 149, Thirteenth Street, Room 2301, Charlestown, MA 02129, United States.

Phone: (617) 726-3197

[brrosen@mgh.harvard.edu](mailto:brrosen@mgh.harvard.edu)

Kenneth K. Kwong PhD

Athinoula A. Martinos Center for Biomedical Imaging, Building 149, Thirteenth Street, Room 2301,  
Charlestown, MA 02129, United States.

Phone: (617) 724-9519

[kkwong@mgh.harvard.edu](mailto:kkwong@mgh.harvard.edu)

## **Abstract**

Breath-by-breath O<sub>2</sub>-CO<sub>2</sub> exchange ratio (bER) is a respiratory gas exchange (RGE) metric, which is the ratio of the changes in the partial pressure of O<sub>2</sub> ( $\Delta\text{PO}_2$ ) to CO<sub>2</sub> ( $\Delta\text{PCO}_2$ ) between end-inspiration and end-expiration, has been demonstrated to characterize the cerebrovascular responses to breath-hold challenge in healthy individuals. We aimed to explore if bER could characterize cerebrovascular responses in patients with chronic mild traumatic brain injury (mTBI) under breath-hold challenge. We also investigated the correlation between bER and the severity of post-concussion symptoms.

Blood-oxygenation-level-dependent (BOLD) images were acquired using functional magnetic resonance imaging (fMRI) on eleven patients with chronic mTBI and eleven controls without brain injury history when performing a breath-hold task. Time series of RGE metrics of  $\Delta\text{PO}_2$ ,  $\Delta\text{PCO}_2$ , and bER were computed, and their cross-correlation with regional change in BOLD ( $\Delta\text{BOLD}$ ) was calculated. Symptom burden was assessed using the Rivermead Post Concussion Questionnaire (RPQ), and its correlation with RGE changes was also measured.

Compared with controls, a diffuse decrease in the correlation between regional  $\Delta\text{BOLD}$  and bER was found in the brain of mTBI patients ( $p_{\text{fdr}} < 0.05$ ). No significant difference was found between patients and controls for the correlation of regional  $\Delta\text{BOLD}$  with  $\Delta\text{PO}_2$  and  $\Delta\text{PCO}_2$ . The averaged changes in bER ( $\rho=0.79$ ,  $p=0.01$ ) and  $\Delta\text{PO}_2$  ( $\rho=0.70$ ,  $p=0.03$ ) in breath-hold epochs decreased with increased symptom severity indicated by RPQ scores.

Our imaging and symptom severity findings suggest that bER can be used to characterize cerebrovascular responses to breath-hold in mTBI patients. RGE may contribute to the post-concussive symptom severity.

## **Introduction**

Traumatic brain injury (TBI) is a global public health problem.<sup>1</sup> A spectrum of post-concussion symptoms varying from headaches, fatigue, sleep, and cognitive disturbances may persist for months or years after TBI.<sup>2</sup> Perturbations in microvascular flow are believed to precede neuronal dysfunction after TBI.<sup>3-5</sup>

Exogenous carbon dioxide (CO<sub>2</sub>) challenge in conjunction with functional magnetic resonance imaging (fMRI) measurement of blood-oxygenation-level-dependent (BOLD) signal in the brain has been used to show reduced/delayed cerebrovascular reactivity (CVR) in patients with chronic TBI.<sup>6-8</sup> However, CO<sub>2</sub> administration involves a complex gas delivery setup, and questions about potentially excessive vasodilation remain a concern for TBI patients at their acute and sub-acute stages when intracranial hemorrhage may be a risk factor. An alternative method for CVR assessment is a breath-hold challenge.<sup>9-14</sup> Increase in cerebral blood flow (CBF) is well established during breath-holding. While authors in the recent neuroimaging literature believe that CBF increase during breath-holding is due to hypercapnia only,<sup>15-17</sup> our team attributed CBF increase in breath-holding to the synergistic effect of both mild hypoxemia and mild hypercapnia due to the continual oxygen (O<sub>2</sub>) uptake and CO<sub>2</sub> release in the closed breathing circuit during breath-holding.<sup>18</sup>

An increase in O<sub>2</sub> uptake had been repeatedly demonstrated to be larger than an increase in CO<sub>2</sub> release during breath-holding since 1946, resulting in a reduction in respiratory exchange ratio (RER), a ratio of CO<sub>2</sub> to O<sub>2</sub> at a steady state.<sup>19-24</sup> The RER results in these studies are consistent with the findings in our recent breath-hold study, where the dynamic breath-by-breath O<sub>2</sub>-CO<sub>2</sub> exchange ratio (bER), a ratio of breath-by-breath O<sub>2</sub> uptake to CO<sub>2</sub> release was increased during breath-holding.<sup>18</sup> bER is defined as the ratio of the changes in the partial pressure of oxygen ( $\Delta\text{PO}_2$ ) to the change in the partial pressure of carbon dioxide ( $\Delta\text{PCO}_2$ ) between end-inspiration and end-expiration.<sup>18</sup> The time-averaged

value of bER is related to the reciprocal of RER. bER was found to demonstrate a strong positive correlation with dynamic global and regional cerebral hemodynamic responses under breath hold challenge;<sup>18</sup> an increase in bER corresponds to an increase in CBF. bER changes were also superior to  $\Delta\text{PCO}_2$  changes in coupling with global and regional cerebrovascular responses to breath-holding.<sup>18</sup> The regional CVR in response to external  $\text{CO}_2$  challenge resembled that in response to bER, more than that in response to  $\Delta\text{PCO}_2$  under breath hold challenge.<sup>18</sup> Notably,  $\Delta\text{PCO}_2$  is interchangeable with the end-tidal partial pressure of  $\text{CO}_2$  ( $\text{P}_{\text{ET}}\text{CO}_2$ ) given the low ambient  $\text{CO}_2$  level. All these findings lend motivation to investigate if bER can characterize the cerebrovascular responses to breath-hold challenge in patients better than  $\Delta\text{PCO}_2$  ( $\text{P}_{\text{ET}}\text{CO}_2$ ).

In the current study, we aimed to characterize the cerebrovascular responses to RGE metrics of  $\Delta\text{PO}_2$ ,  $\Delta\text{PCO}_2$ , and bER in patients with mild traumatic brain injury (mTBI) under breath-hold challenge. We hypothesized that the cerebrovascular responses to breath-hold challenge measured by BOLD signal changes ( $\Delta\text{BOLD}$ ) would have a stronger correlation with bER than with  $\Delta\text{PCO}_2$  in patients with mTBI.  $\Delta\text{BOLD}$  would also be less correlated with bER in compromised brain regions of patients than in normal brain regions of age-matched controls. Temporal and frequency features of RGE metrics in their coherence with  $\Delta\text{BOLD}$  were also examined. The potential clinical impact was evaluated by correlating RGE metrics with symptom severity indicated by the Rivermead Post Concussion Questionnaire (RPQ) scores.

## **Materials and Method**

### **Study design**

We performed a prospective breath-hold fMRI study on a cohort of patients with chronic mTBI and age-matched controls without a history of brain injuries. All the experimental procedures were explained to the subjects. Signed informed consent was obtained before participating in the study. All procedures were performed in compliance with the Declaration of Helsinki and approved by the Massachusetts General Hospital (MGH) Human Research Committee.

### **Participants**

Patients diagnosed with mTBI for at least three months since the head impact were recruited at the MGH Neurology Clinic. The patients did not have a loss of consciousness or had a loss of consciousness of <30 minutes' duration, and the Glasgow Coma Scale (GCS) score was  $\geq 13$ .<sup>25,26</sup> No abnormality was reported in the structural brain images. Control subjects without a history of brain injuries were also recruited.

### **MRI Acquisition**

Three-dimensional T1-MEMPRAGE (TR/TE1/TE2/TE3/TE4=2530/1.64/3.5/5.36/7.22ms, matrix=256×256×176, resolution=1×1×1mm<sup>3</sup>) and T2-SPACE FLAIR (TR/TE/TI=5000/355/1800ms, matrix=192×192×176, resolution=1×1×1mm<sup>3</sup>) images were acquired on a 3-Tesla scanner (Siemens Medical, Erlangen, Germany). BOLD-fMRI images were acquired with gradient-echo EPI sequence (TR/TE=1450/30ms, matrix=64×64, resolution=3.4×3.4×5mm<sup>3</sup>), while the subject was performing the breath-hold task. The timing of the breath-hold task was presented visually to the subject by a computer using the software Eprime Professional 2.0 (Psychology Software Tools, Inc., Pittsburgh, USA) (**Figure 1**). A breath-hold rehearsal was given before fMRI. No special instruction on the breath-holding after inhalation or exhalation was delivered to the subjects because BOLD signal amplitude has been

suggested to depend on the depth of inspiration immediately preceding the breath-hold period,<sup>27</sup> and end-expiration breath-hold may induce significant head motion.<sup>28</sup>

The partial pressure of O<sub>2</sub> (PO<sub>2</sub>) and CO<sub>2</sub> (PCO<sub>2</sub>) and respiration were measured simultaneously with MRI acquisition. A small nasal tubing was placed at the subject's nostril to sample PCO<sub>2</sub> and PO<sub>2</sub> via gas analyzers (Capstar-100, Oxystar-100, CWE, Inc., PA, USA) after calibrating to the barometric pressure immediately before the scan and correcting for vapor pressure. Respiration was measured using a respiratory bellow connected to a spirometer (FE141, ADInstruments, Inc., CO, USA). All the physiological measurements were synchronized using trigger signals from the MRI scanner.

### **Physiological data processing**

The physiological data were analyzed using Matlab R2014a (Mathworks, Inc., Natick, MA, USA). Technical delay of PCO<sub>2</sub> and PO<sub>2</sub> was corrected by cross-correlating the time series of PCO<sub>2</sub> and PO<sub>2</sub> with respiratory phases determined from the respiratory bellow. End-inspiration (I) and end-expiration (E) were defined on the time series of PO<sub>2</sub> and PCO<sub>2</sub>, and were verified by the inspiratory and expiratory phases on the respiration time series. Changes in the gas parameters in the breath-hold periods were interpolated by the values measured immediately before and after the breath-hold periods. Breath-by-breath O<sub>2</sub>-CO<sub>2</sub> exchange ratio (bER) is defined as the ratio of the change in PO<sub>2</sub> ( $\Delta\text{PO}_2 = \text{inspired PO}_2 - \text{expired PO}_2$ ) to the change in PCO<sub>2</sub> ( $\Delta\text{PCO}_2 = \text{expired PCO}_2 - \text{inspired PCO}_2$ ) measured between end-inspiration and end-expiration in each respiratory cycle. The bER,  $\Delta\text{PO}_2$  and  $\Delta\text{PCO}_2$  measured in the baseline periods, i.e., the period before the first breath-hold epoch, were calculated. As the breath-hold duration might vary from one epoch to another, the changes of bER,  $\Delta\text{PO}_2$  and  $\Delta\text{PCO}_2$  in each breath-hold epoch were normalized to a 30-second breath-hold epoch by dividing the changes to the actual breath-hold duration in seconds and multiplying by 30.<sup>21</sup> The normalized changes of each parameter over the six breath-hold epochs were then averaged.



## Image processing

All the BOLD-fMRI data were analyzed using software AFNI.<sup>29</sup> The first 12 volumes of each functional dataset collected before equilibrium magnetization was reached, were discarded. Each functional dataset was corrected for slice timing, motion-corrected, and co-registered to the first image of the functional dataset. The time series of each voxel was detrended with the fifth order of polynomials to remove the low drift frequency, and the components of motion were removed using orthogonal projection. Head motions were quantified and compared between patients and controls (**Supplementary Figure 1**). The clean time series was then normalized to its mean intensity value. Voxels located within the ventricles and outside the brain were excluded from the following analyses of functional images. Individual subject brain volumes with time series of percent BOLD signal changes ( $\Delta$ BOLD) were derived.

Hilbert Transform analysis<sup>30</sup> was used to measure the cross-correlation between the  $\Delta$ BOLD and the reference time series of RGE metrics (bER,  $\Delta$ PO<sub>2</sub> and  $\Delta$ PCO<sub>2</sub>) in each voxel. Fisher's Z-transformation was used to convert the cross-correlation coefficients in the individual subject maps to Fisher's z scores. Individual subject brain volumes with Fisher's z scores were then registered onto the subjects' anatomical scans and transformed to the standardized space of Talairach and Tournoux<sup>31</sup> for group analysis.

Wavelet Transform coherence<sup>32</sup> was used to measure the dynamic changes in coupling between the time series of RGE metrics and  $\Delta$ BOLD extracted from brain regions in the time-frequency domain. The analysis procedures were the same as those described in our other breath-hold study.<sup>18</sup> The brain regions in gray and white matter were segmented using the software FreeSurfer.<sup>33,34</sup> Example of squared wavelet coherence between bER and  $\Delta$ BOLD in gray matter from a representative patient under breath-hold challenge is shown in **Supplementary Figure 2**. The percentage of significant coherence

(sCoh%) defined as the percentage of time during which the magnitude of wavelet transform coherence was significantly different from the red noise outside the cone of influence was used to quantify the dynamic coupling between the time series of each RGE metric and  $\Delta$ BOLD (**Supplementary Figure 2C**).

### Statistical analysis

Continuous variables (i.e., age and RGE metrics) were summarized as median and interquartile range, and group (mTBI and control) differences were assessed using the Kruskal-Wallis tests. Categorical variable (i.e., gender) was summarized as frequencies; group difference was assessed using the Chi-square test. Spearman correlation analyses were used to correlate in pairs the RPQ scores, age, and breath-hold duration and normalized changes in RGE metrics (bER,  $\Delta$ PO<sub>2</sub> and  $\Delta$ PCO<sub>2</sub>) averaged over the six breath-hold epochs. Significant differences or correlations were considered at  $p < 0.05$ .

Unpaired t-tests (3dttest++) in AFNI were used to compare the cerebrovascular responses to breath-hold challenge (i.e., Fisher's z scores from Hilbert Transform analysis) between patients and controls. Multiple comparisons were corrected using equitable thresholding and clustering (ETAC) method.<sup>35</sup> The group results were painted onto the averaged brain surfaces reconstructed by FreeSurfer.<sup>33,34</sup>

The sCoh% at the phase lags of  $0 \pm \pi/2$  and  $\pi \pm \pi/2$  from the individual subject wavelet transform analysis were separately plotted for mTBI and control groups to explore the Fourier periods/frequency bandwidths that oscillations of  $\Delta$ BOLD in gray and white matter were in synchrony with each physiological time series of bER,  $\Delta$ PO<sub>2</sub> and  $\Delta$ PCO<sub>2</sub> when the subjects were performing breath-hold tasks. The sCoh% of RGE metrics with  $\Delta$ BOLD in the six frequency bandwidths (0.008-0.015Hz, 0.016-0.03Hz, 0.031-0.062Hz, 0.063-0.124Hz, 0.125-0.249Hz, and 0.25-0.5Hz) extracted in the brain regions showing significant differences in Fisher's z scores between mTBI and control groups was

calculated for each subject. The distribution of sCoh% in these brain regions of the mTBI and control groups was then compared using the Kolmogorov-Smirnov test. Significant differences in the distribution of the sCoh% were considered at  $p < 0.05$ .

## **Results**

Twenty subjects aged from 20 to 57 years were included. Ten of them were patients diagnosed with mTBI (median=38 years, interquartile range IQR=25.75-46.75 years; 5M and 5F). The selected clinical characteristics of the patients are shown in **Table 1**. The remaining ten were control subjects without brain injury history (median=28 years, IQR=25.25-34.25 years; 6M and 4F). No significant differences in age ( $p=0.34$ ) and sex ( $p=0.65$ ) were found between patients with mTBI and control subjects.

The bER,  $\Delta PO_2$  and  $\Delta PCO_2$  measured in the baseline periods were summarized in **Table 2**. The averaged breath-hold duration, the averaged changes of bER,  $\Delta PO_2$  and  $\Delta PCO_2$  over the six breath-hold epochs were also included. The averaged changes of  $\Delta PO_2$  during breath-holding were almost 3 to 4 folds larger than those of  $\Delta PCO_2$ . No significant difference in the RGE metrics was found between mTBI and control groups in the baseline periods and breath-hold epochs ( $p>0.05$ ). No structural abnormality was identified in the T1-weighted and T2 FLAIR images of all subjects.

### **Correlation among RPQ scores, age and changes in RGE metrics**

The correlation results among RPQ scores, age, breath-hold durations, and RGE metrics changes are summarized in **Figure 2**. During breath-holding, a significant correlation was found between RPQ scores and the averaged changes in bER (Spearman's  $\rho=-0.79$ ,  $p=0.01$ ), between RPQ scores and the averaged changes in  $\Delta PO_2$  (Spearman's  $\rho=-0.70$ ,  $p=0.03$ ), and between the averaged changes in bER and  $\Delta PO_2$  (Spearman's  $\rho=0.95$ ,  $p<0.001$ ). No significant correlation was found in the remaining correlation pairs ( $p>0.05$ ).

### **Comparison of the cross-correlation of $\Delta BOLD$ with RGE metrics between patients with mTBI and controls**

Time series of  $\Delta$ BOLD in left gray matter and the corresponding RGE metrics in a representative mTBI patient and a control subject under breath-hold challenge are shown in **Figure 3**. The time series of bER followed more closely to  $\Delta$ BOLD than  $\Delta$ PO<sub>2</sub> and  $\Delta$ PCO<sub>2</sub> in both representative patient and control subject.

Compared with control subjects, a significant decrease in the cross-correlation between  $\Delta$ BOLD and bER was mapped by fMRI in patients with mTBI at superior and middle frontal, precentral and postcentral, insular, superior parietal, middle and inferior temporal, paracentral, precuneus, posterior cingulate, cuneus, lingual, hippocampal and parahippocampal areas ( $p_{\text{fdr}} < 0.05$ ) (**Figure 4**). No significant difference was found in the cross-correlation of  $\Delta$ BOLD with  $\Delta$ PO<sub>2</sub> and  $\Delta$ PCO<sub>2</sub> between patients and controls.

### **Dynamic coupling between RGE metrics and $\Delta$ BOLD**

In both the patients with mTBI and the control subjects, the dynamic coupling indicated by the sCoh% between bER and  $\Delta$ BOLD at phase lag of  $0 \pm \pi/2$  was the highest in the frequency range of 0.008-0.03 Hz while that between  $\Delta$ PCO<sub>2</sub> and  $\Delta$ BOLD was the lowest in the same frequency range (**Figure 5**). The dynamic coupling between RGE metrics and  $\Delta$ BOLD was weak at the phase lag of  $\pi \pm \pi/2$  and the sCoh% stayed around 20% or below (**Supplementary Figure 3**). Comparing with control subjects, the dynamic coupling of bER and  $\Delta$ PO<sub>2</sub> with  $\Delta$ BOLD in the frequency range of 0.008-0.03Hz and at phase lag of  $0 \pm \pi/2$  was reduced in patients (**Figure 5**).

In the brain regions showing significant differences in the Fisher's z scores between mTBI and control groups, the distribution of the sCoh% for the dynamic coupling of bER with  $\Delta$ BOLD was significantly different between mTBI and control groups at the frequency bandwidths of 0.008-0.015Hz and phase lag of  $0 \pm \pi/2$  ( $p=0.03$ ) (**Figure 6**). No significant difference in the distribution of sCoh% was

found between patients and controls for the dynamic coupling of  $\Delta\text{PO}_2$  and  $\Delta\text{PCO}_2$  with  $\Delta\text{BOLD}$  in all frequency bandwidths and phase lag of  $0 \pm \pi/2$ .

## **Discussion**

To our knowledge, this is the first study to characterize cerebrovascular responses with bER under brief breath-hold challenge in patients. We showed that the dynamic coupling of cerebrovascular responses with bER and  $\Delta\text{PO}_2$  was stronger than that with  $\Delta\text{PCO}_2$  in patients with chronic mTBI, similar to our previous breath hold results on healthy subjects.<sup>18</sup> In patients with mTBI, the bER- $\Delta\text{BOLD}$  correlation under brief breath-hold challenge was significantly reduced in multiple brain regions when compared with control subjects who did not have a brain injury history. The averaged changes in bER and  $\Delta\text{PO}_2$  in the breath-hold epochs decreased with increased symptom severity indicated by RPQ scores, while no such changes were observed between  $\Delta\text{PCO}_2$  and RPQ scores. Patients with more severe symptoms showed a smaller increase in bER during breath-holding. The correlation between the symptom severity and the changes in bER and  $\Delta\text{PO}_2$  during breath-holding could not be attributed to the breath-hold duration, as the changes in RGE metrics (bER,  $\Delta\text{PO}_2$  and  $\Delta\text{PCO}_2$ ) were normalized to a 30-second breath-hold epoch, and the breath-hold duration was not correlated with RPQ, age, or changes in RGE metrics.

Many research teams<sup>19-24</sup> including ours<sup>18</sup> reported earlier a larger increase of  $\text{O}_2$  uptake than  $\text{CO}_2$  release under breath-hold challenge, resulting in reduced RER or increased bER for healthy subjects. Our current gas measurements on patients with mTBI again suggest the synergistic role of mild hypoxemia and mild hypercapnia during breath-holding. A strong correlation of the changes in bER with  $\Delta\text{PO}_2$  but not with  $\Delta\text{PCO}_2$  in patients during breath-holding (**Figure 2**) indicates that bER, being the ratio of  $\Delta\text{PO}_2$  to  $\Delta\text{PCO}_2$ , is predominantly affected by  $\Delta\text{PO}_2$ .

In this study, we showed a significant decrease in the correlation between  $\Delta\text{BOLD}$  and bER in response to breath-hold challenge in multiple brain regions of patients using Hilbert Transform analysis (**Figure 4**). These brain regions are responsible for the brain functions for attention, memory, visual

processing, auditory processing, executive and autonomic functions.<sup>36</sup> They also showed a general pattern that resembles the structurally atrophied regions of patients with mTBI reported by Warner et al.<sup>36</sup> The intermittent cross-correlations between bER and  $\Delta$ BOLD was then characterized as a function of both time and frequency in these brain regions using Wavelet Transform coherence analysis based on continuous wavelet transform.<sup>32,37</sup>

Like our previous breath-hold study in healthy individuals,<sup>18</sup> bER had the most robust dynamic coupling with cerebral  $\Delta$ BOLD for both mTBI patients and controls at the frequency range of 0.008-0.03Hz;  $\Delta$ PCO<sub>2</sub> had the weakest coupling while  $\Delta$ PO<sub>2</sub> had an intermediate coupling (**Figure 5**). Compared with controls, the coherence of bER with  $\Delta$ BOLD was reduced in patients at the frequency range of 0.008 -0.03Hz. Concerns of using BOLD signal as a CBF surrogate had been addressed by another independent verification of the coupling between bER and CBF<sup>18</sup> using CBF velocity measured by transcranial Doppler ultrasound at a sampling rate of 100Hz.

The dynamic coupling between bER and  $\Delta$ BOLD was then measured in the selected brain regions showing a decreased correlation in Hilbert Transform analysis and showed significant inter-subject variations among patients at the frequency range of 0.008-0.015Hz compared with controls (**Figure 6**). Such inter-subject variability may be due to the heterogeneity of brain injuries. bER, but not  $\Delta$ PO<sub>2</sub> or  $\Delta$ PCO<sub>2</sub>, showed a significant difference in coupling with  $\Delta$ BOLD between patients and controls at the frequency range of 0.008-0.015Hz. Given that bER is predominantly affected by  $\Delta$ PO<sub>2</sub>, we attributed the somewhat surprising lack of statistical significance for  $\Delta$ PO<sub>2</sub> to the effect of ventilatory volume fluctuations common to both  $\Delta$ PO<sub>2</sub> and  $\Delta$ PCO<sub>2</sub>. In comparison with  $\Delta$ PO<sub>2</sub>, the format of bER as a ratio of  $\Delta$ PO<sub>2</sub> to  $\Delta$ PCO<sub>2</sub> has the advantage of being less affected by the ventilatory volume fluctuations resulting from isolated deep breaths. Future studies with a larger sample size are warranted to clarify the role between bER and  $\Delta$ PO<sub>2</sub>.



## **Conclusion**

bER is a more useful metric to characterize the cerebrovascular responses to breath-hold challenge in patients with mTBI. The correlation between bER changes and symptom severity during breath-holding also suggests a relationship between RGE and post-concussion symptoms. Future studies with a large cohort of subjects would help explore the underlying mechanisms between RGE, cerebral hemodynamics, and post-concussion symptoms in mTBI patients.

### Authorship confirmation statement

| <b>Name</b>                   | <b>Location</b>                   | <b>Role</b> | <b>Contribution</b>                                                                                                                 |
|-------------------------------|-----------------------------------|-------------|-------------------------------------------------------------------------------------------------------------------------------------|
| Suk Tak Chan, PhD             | Massachusetts General<br>Hospital | Author      | Design and conceptualized study; data collection and analysis; data interpretation; drafted the manuscript for intellectual content |
| Cora Ordway, BA               | Massachusetts General<br>Hospital | Author      | Data collection and analysis                                                                                                        |
| Ronald J. Calvano, PhD        | Massachusetts General<br>Hospital | Author      | Design and conceptualized study; data analysis; data interpretation; revision of manuscript                                         |
| Ferdinando S.<br>Buonanno, MD | Massachusetts General<br>Hospital | Author      | Design and conceptualized study; data interpretation; revision of manuscript                                                        |
| Bruce R. Rosen, MD,<br>PhD    | Massachusetts General<br>Hospital | Author      | drafted the manuscript for intellectual content; revision of manuscript                                                             |
| Kenneth K. Kwong, PhD         | Massachusetts General             | Author      | Design and                                                                                                                          |

|  |          |  |                                                                                                                                                                    |
|--|----------|--|--------------------------------------------------------------------------------------------------------------------------------------------------------------------|
|  | Hospital |  | conceptualized study;<br>data collection and<br>analysis; data<br>interpretation; drafted<br>the manuscript for<br>intellectual content;<br>revision of manuscript |
|--|----------|--|--------------------------------------------------------------------------------------------------------------------------------------------------------------------|

### **Authors' disclosure statement**

The authors declare that the research was conducted in the absence of any commercial or financial relationships that could be construed as a potential conflict of interest.

### **Data availability statement**

The original contributions presented in the study are included in the article/supplementary materials. Further inquiries can be directed to the corresponding author.

### **Funding statement**

This research was carried out in whole at the Athinoula A. Martinos Center for Biomedical Imaging at the Massachusetts General Hospital, using resources provided by the Center for Functional Neuroimaging Technologies, P41EB015896, a P41 Biotechnology Resource Grant supported by the National Institute of Biomedical Imaging and Bioengineering (NIBIB), National Institutes of Health, as well as the Shared Instrumentation Grant S10RR023043. This study was also supported, in part, by National Center for Complementary and Integrative Health (NCCIH) grant (R21AT010955).

## **References**

1. G. B. D. Traumatic Brain Injury Spinal Cord Injury, C. (2019). Global, regional, and national burden of traumatic brain injury and spinal cord injury, 1990-2016: a systematic analysis for the Global Burden of Disease Study 2016. *Lancet Neurol* 18, 56-87.
2. Ryan, L.M. and Warden, D.L. (2003). Post concussion syndrome. *Int Rev Psychiatry* 15, 310-316.
3. Kenney, K., Amyot, F., Haber, M., Pronger, A., Bogoslovsky, T., Moore, C. and Diaz-Arrastia, R. (2016). Cerebral Vascular Injury in Traumatic Brain Injury. *Exp Neurol* 275 Pt 3, 353-366.
4. Werner, C. and Engelhard, K. (2007). Pathophysiology of traumatic brain injury. *Br J Anaesth* 99, 4-9.
5. Oppenheimer, D.R. (1968). Microscopic lesions in the brain following head injury. *J Neurol Neurosurg Psychiatry* 31, 299-306.
6. Amyot, F., Kenney, K., Moore, C., Haber, M., Turtzo, L.C., Shenouda, C., Silverman, E., Gong, Y., Qu, B.X., Harburg, L., Lu, H.Y., Wassermann, E.M. and Diaz-Arrastia, R. (2018). Imaging of Cerebrovascular Function in Chronic Traumatic Brain Injury. *J Neurotrauma* 35, 1116-1123.
7. Mutch, W.A., Ellis, M.J., Ryner, L.N., Ruth Graham, M., Dufault, B., Gregson, B., Hall, T., Bunge, M., Essig, M., Fisher, J.A., Duffin, J. and Mikulis, D.J. (2016). Brain magnetic resonance imaging CO<sub>2</sub> stress testing in adolescent postconcussion syndrome. *J Neurosurg* 125, 648-660.
8. Dodd, A.B., Lu, H., Wertz, C.J., Ling, J.M., Shaff, N.A., Wasserott, B.C., Meier, T.B., Park, G., Oglesbee, S.J., Phillips, J.P., Campbell, R.A., Liu, P. and Mayer, A.R. (2020). Persistent alterations in cerebrovascular reactivity in response to hypercapnia following pediatric mild traumatic brain injury. *J Cereb Blood Flow Metab* 40, 2491-2504.
9. Kastrup, A., Li, T.Q., Glover, G.H. and Moseley, M.E. (1999). Cerebral blood flow-related signal changes during breath-holding. *Am J Neuroradiol* 20, 1233-1238.

10. Markus, H.S. and Harrison, M.J. (1992). Estimation of cerebrovascular reactivity using transcranial Doppler, including the use of breath-holding as the vasodilatory stimulus. *Stroke* 23, 668-673.
11. Ratnatunga, C. and Adisesiah, M. (1990). Increase in middle cerebral artery velocity on breath holding: a simplified test of cerebral perfusion reserve. *Eur J Vasc Surg* 4, 519-523.
12. Vernieri, F., Pasqualetti, P., Passarelli, F., Rossini, P.M. and Silvestrini, M. (1999). Outcome of carotid artery occlusion is predicted by cerebrovascular reactivity. *Stroke* 30, 593-598.
13. Silvestrini, M., Vernieri, F., Troisi, E., Passarelli, F., Matteis, M., Pasqualetti, P., Rossini, P.M. and Caltagirone, C. (1999). Cerebrovascular reactivity in carotid artery occlusion: possible implications for surgical management of selected groups of patients. *Acta Neurol Scand* 99, 187-191.
14. Pillai, J.J. and Mikulis, D.J. (2015). Cerebrovascular reactivity mapping: an evolving standard for clinical functional imaging. *Am J Neuroradiol* 36, 7-13.
15. Bright, M.G. and Murphy, K. (2013). Reliable quantification of BOLD fMRI cerebrovascular reactivity despite poor breath-hold performance. *NeuroImage* 83, 559-568.
16. Murphy, K., Harris, A.D. and Wise, R.G. (2011). Robustly measuring vascular reactivity differences with breath-hold: normalising stimulus-evoked and resting state BOLD fMRI data. *NeuroImage* 54, 369-379.
17. Tancredi, F.B. and Hoge, R.D. (2013). Comparison of cerebral vascular reactivity measures obtained using breath-holding and CO<sub>2</sub> inhalation. *J Cereb Blood Flow Metab* 33, 1066-1074.
18. Chan, S.T., Evans, K.C., Song, T.Y., Selb, J., van der Kouwe, A., Rosen, B.R., Zheng, Y.P., Ahn, A. and Kwong, K.K. (2020). Cerebrovascular reactivity assessment with O<sub>2</sub>-CO<sub>2</sub> exchange ratio under brief breath hold challenge. *PLoS One* 15, e0225915.
19. Dubois, A.B. (1952). Alveolar CO<sub>2</sub> and O<sub>2</sub> during breath holding, expiration, and inspiration. *J Appl Physiol* 5, 1-12.

20. Hong, S.K., Lin, Y.C., Lally, D.A., Yim, B.J., Kominami, N., Hong, P.W. and Moore, T.O. (1971). Alveolar gas exchanges and cardiovascular functions during breath holding with air. *J Appl Physiol* 30, 540-547.
21. Lindholm, P. and Linnarsson, D. (2002). Pulmonary gas exchange during apnoea in exercising men. *Eur J Appl Physiol* 86, 487-491.
22. Lindholm, P. and Lundgren, C.E. (2006). Alveolar gas composition before and after maximal breath-holds in competitive divers. *Undersea Hyperb Med* 33, 463-467.
23. Otis, A.B., Rahn, H. and Fenn, W.O. (1948). Alveolar gas changes during breath holding. *Am J Physiol* 152, 674-686.
24. Ferris, E.B., Engel, G.L., Stevens, C.D. and Webb, J. (1946). Voluntary Breathholding. Iii. The Relation of the Maximum Time of Breathholding to the Oxygen and Carbon Dioxide Tensions of Arterial Blood, with a Note on Its Clinical and Physiological Significance. *J Clin Invest* 25, 734-743.
25. Mayer, A.R., Quinn, D.K. and Master, C.L. (2017). The spectrum of mild traumatic brain injury: A review. *Neurology* 89, 623-632.
26. O'Neil, M.E., Carlson, K., Storzbach, D., Brenner, L., Freeman, M., Quinones, A., Motu'apuaka, M., Ensley, M. and Kansagara, D. (2013). In: *Complications of Mild Traumatic Brain Injury in Veterans and Military Personnel: A Systematic Review*: Washington (DC).
27. Thomason, M.E. and Glover, G.H. (2008). Controlled inspiration depth reduces variance in breath-holding-induced BOLD signal. *Neuroimage* 39, 206-214.
28. Thomason, M.E., Foland, L.C. and Glover, G.H. (2007). Calibration of BOLD fMRI using breath holding reduces group variance during a cognitive task. *Hum Brain Mapp* 28, 59-68.
29. Cox, R.W. (1996). AFNI: software for analysis and visualization of functional magnetic resonance neuroimages. *Comput Biomed Res* 29, 162-173.

30. Saad, Z.S., DeYoe, E.A. and Ropella, K.M. (2003). Estimation of fMRI response delays. *Neuroimage* 18, 494-504.
31. Talairach, J. and Tournoux, P. (1988). Co-planar stereotaxic atlas of the human brain : 3-dimensional proportional system : an approach to cerebral imaging. Georg Thieme: Stuttgart ; New York.
32. Grinsted, A., Moore, J.C. and Jevrejeva, S. (2004). Application of the cross wavelet transform and wavelet coherence to geophysical time series. *Nonlinear Process Geophys* 11.
33. Dale, A.M., Fischl, B. and Sereno, M.I. (1999). Cortical surface-based analysis. I. Segmentation and surface reconstruction. *Neuroimage* 9, 179-194.
34. Fischl, B., Sereno, M.I. and Dale, A.M. (1999). Cortical surface-based analysis. II: Inflation, flattening, and a surface-based coordinate system. *Neuroimage* 9, 195-207.
35. Cox, R.W. (2019). Equitable Thresholding and Clustering: A Novel Method for Functional Magnetic Resonance Imaging Clustering in AFNI. *Brain Connect* 9, 529-538.
36. Warner, M.A., Youn, T.S., Davis, T., Chandra, A., Marquez de la Plata, C., Moore, C., Harper, C., Madden, C.J., Spence, J., McColl, R., Devous, M., King, R.D. and Diaz-Arrastia, R. (2010). Regionally selective atrophy after traumatic axonal injury. *Arch Neurol* 67, 1336-1344.
37. Torrence, C. and Compo, G.P. (1998). A Practical Guide to Wavelet Analysis. *Bull Am Meteorol Soc* 79, 61-78.



**Correspondence address:**

Suk-tak Chan, PhD

Athinoula A. Martinos Center for Biomedical Imaging, Building 149, Thirteenth Street, Room 2301,  
Charlestown, MA 02129, United States.

Phone: (617) 724-7194

[stchan@mgh.harvard.edu](mailto:stchan@mgh.harvard.edu)

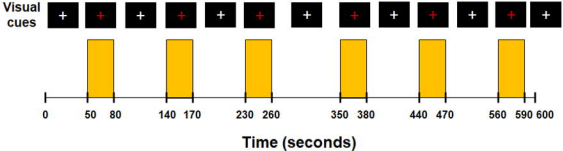

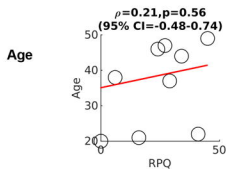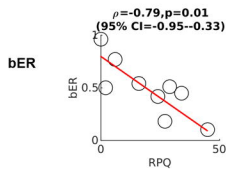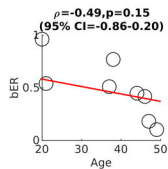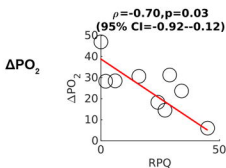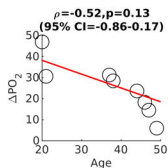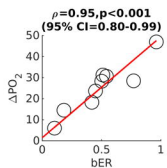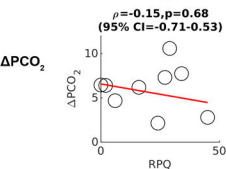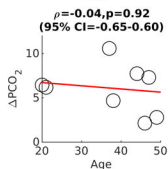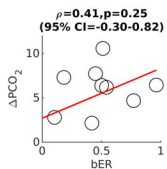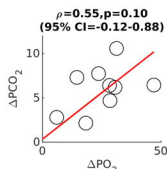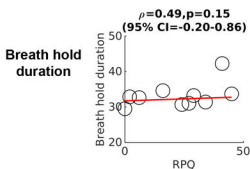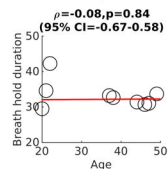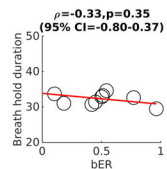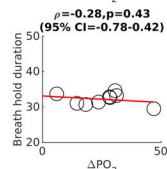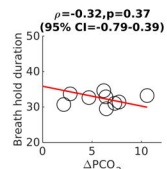

**(A) mTBI patient**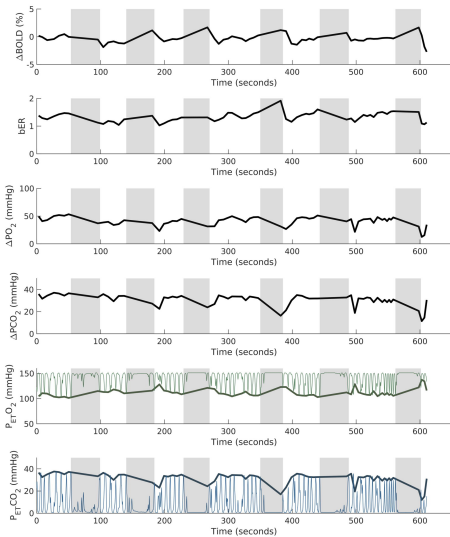**(B) Control without brain injury**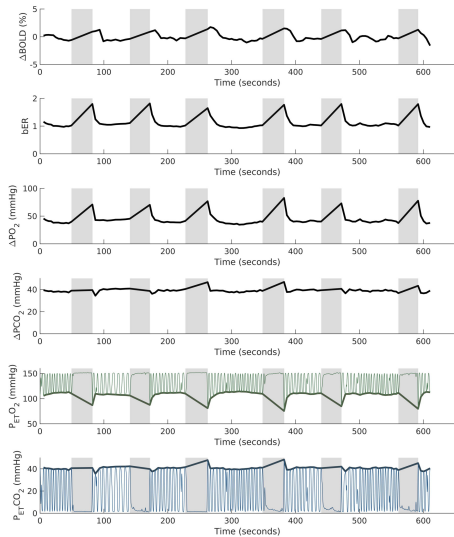

*Lateral hemispheric surfaces*

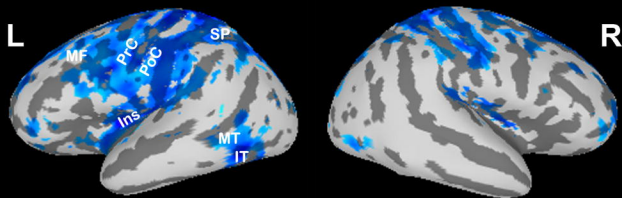

*Medial hemispheric surfaces*

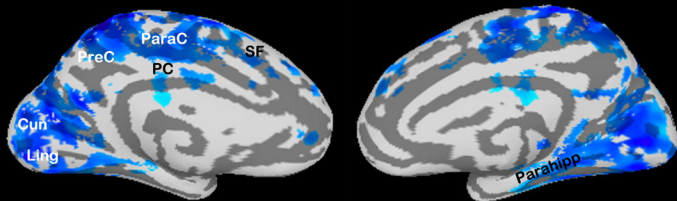

Fisher's z  
(mTBI - Controls)

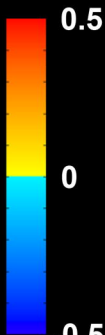

( $p_{\text{fdr}} < 0.05$ )

# Percentage of significant coherence at the phase lag of $0 \pm \pi/2$

## Controls without brain injury

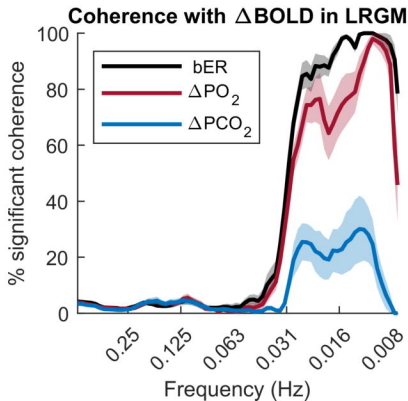

## mTBI patients

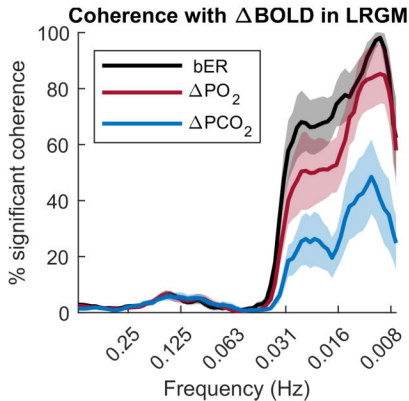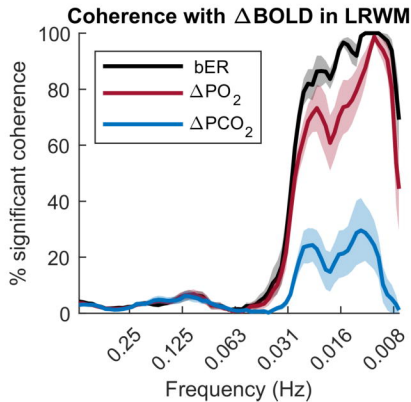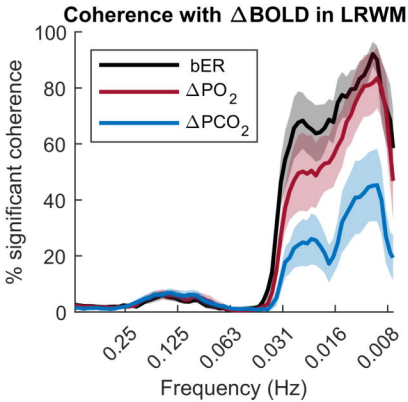

# Percentage of significant coherence at the phase lag of $0 \pm \pi/2$

## Coherence of bER with $\Delta$ BOLD

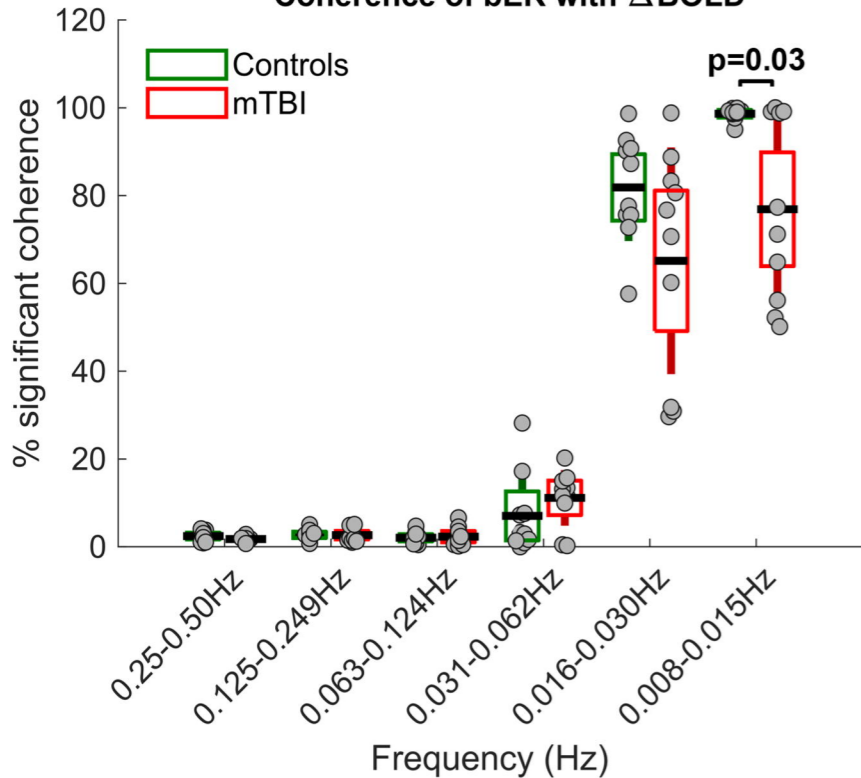

## Coherence of $\Delta$ PO<sub>2</sub> with $\Delta$ BOLD

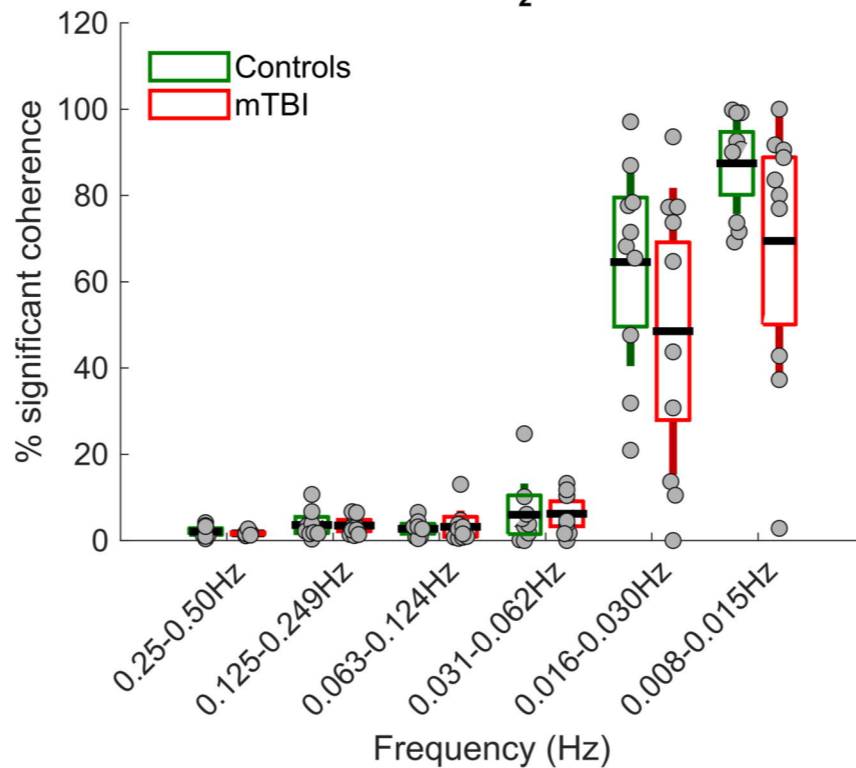

## Coherence of $\Delta$ PCO<sub>2</sub> with $\Delta$ BOLD

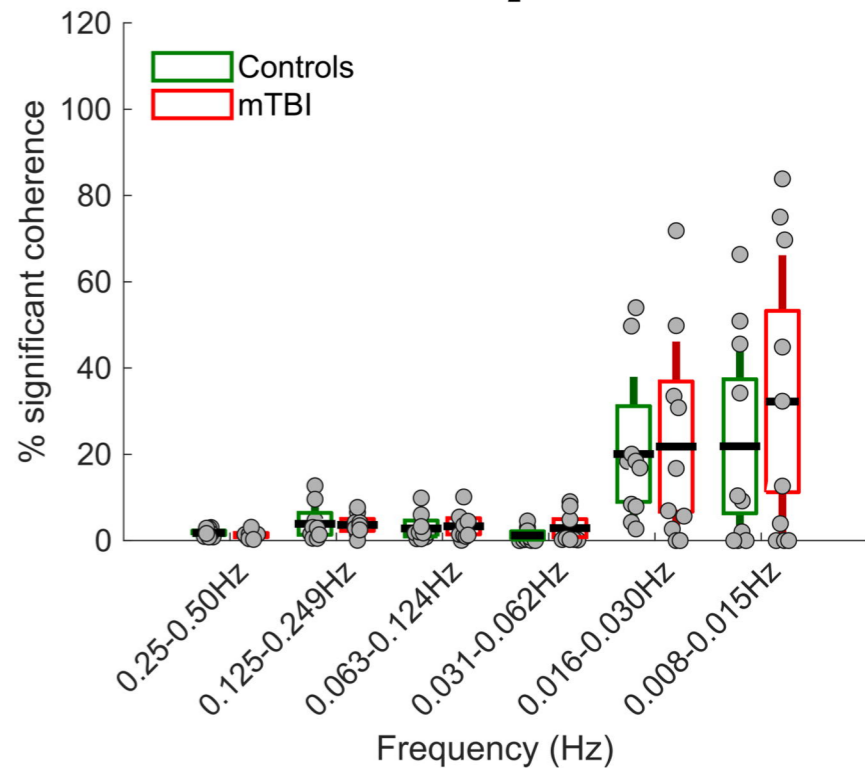

**Table 1.** Selected clinical characteristics of the patients with mTBI.

| <b>Subjects</b> | <b>Sex</b> | <b>Age</b> | <b>Duration of Injury<br/>(days)</b> | <b>Cause of Injury</b>     | <b>RPQ Scores</b> |
|-----------------|------------|------------|--------------------------------------|----------------------------|-------------------|
| m1              | F          | 44         | 846                                  | Motor vehicle accident     | 34                |
| m2              | F          | 47         | 1704                                 | Motor vehicle accident     | 27                |
| m3              | M          | 38         | 109                                  | Sports injury (basketball) | 6                 |
| m4              | M          | 37         | 1614                                 | Motor vehicle accident     | 29                |
| m5              | M          | 49         | 1579                                 | Motor vehicle accident     | 45                |
| m6              | M          | 57         | 237                                  | Sports injury (skiing)     | 2                 |
| m7              | F          | 22         | 630                                  | Fall                       | 41                |
| m8              | F          | 20         | 1000                                 | Fall                       | 0                 |
| m9              | F          | 21         | 2588                                 | Sports injury (soccer)     | 16                |
| m10             | F          | 46         | 481                                  | Motor vehicle accident     | 24                |

M, male; F, female



**Table 2.** Baseline RGE values before the first breath-hold epoch and the averaged changes of RGE metrics during breath-holding.

| Baseline       |                                           |                                          |                             |                            |                  | Averaged Changes From the Onset to the End of Breath Hold Epochs |                             |                            |                  |
|----------------|-------------------------------------------|------------------------------------------|-----------------------------|----------------------------|------------------|------------------------------------------------------------------|-----------------------------|----------------------------|------------------|
| Subjects       | P <sub>ET</sub> CO <sub>2</sub><br>(mmHg) | P <sub>ET</sub> O <sub>2</sub><br>(mmHg) | ΔPCO <sub>2</sub><br>(mmHg) | ΔPO <sub>2</sub><br>(mmHg) | bER              | Breath Hold<br>Duration<br>(seconds)                             | ΔPCO <sub>2</sub><br>(mmHg) | ΔPO <sub>2</sub><br>(mmHg) | bER              |
| <i>mTBI</i>    |                                           |                                          |                             |                            |                  |                                                                  |                             |                            |                  |
| m1             | 34.4 (0.2)                                | 120.5 (1.0)                              | 33.8 (0.2)                  | 29.5 (1.3)                 | 0.9 (0.0)        | 31.4 (1.0)                                                       | 7.7 (2.9)                   | 23.7 (9.9)                 | 0.4 (0.2)        |
| m2             | 34.9 (1.9)                                | 118.3 (4.3)                              | 33.9 (2.0)                  | 34.2 (4.9)                 | 1.0 (0.1)        | 31.0 (1.2)                                                       | 7.3 (5.1)                   | 14.5 (11.0)                | 0.2 (0.2)        |
| m3             | 34.4 (1.0)                                | 121.5 (2.8)                              | 33.1 (1.3)                  | 25.8 (3.7)                 | 0.8 (0.1)        | 32.6 (1.1)                                                       | 4.7 (3.4)                   | 28.5 (6.9)                 | 0.8 (0.2)        |
| m4             | 35.1 (1.0)                                | 118.2 (2.3)                              | 33.5 (1.1)                  | 30.2 (2.6)                 | 0.9 (0.1)        | 33.2 (1.1)                                                       | 10.6 (2.0)                  | 31.2 (3.2)                 | 0.5 (0.1)        |
| m5             | 37.3 (0.7)                                | 114.8 (3.1)                              | 35.7 (0.7)                  | 34.5 (4.2)                 | 1.0 (0.1)        | 33.7 (1.4)                                                       | 2.8 (2.5)                   | 6.0 (3.2)                  | 0.1 (0.0)        |
| m6             | 36.0 (0.5)                                | 101.7 (1.5)                              | 34.2 (0.6)                  | 46.0 (1.7)                 | 1.3 (0.0)        | 32.9 (1.7)                                                       | 6.4 (5.0)                   | 28.3 (9.0)                 | 0.5 (0.3)        |
| m7             | 35.5 (1.5)                                | 107.4 (2.6)                              | 34.8 (1.6)                  | 45.8 (3.3)                 | 1.3 (0.0)        | 42.3 (4.3)                                                       | -5.5 (5.4)                  | -9.1 (4.1)                 | 0.0 (0.2)        |
| m8             | 37.5 (0.5)                                | 108.7 (1.3)                              | 35.8 (0.7)                  | 44.4 (1.6)                 | 1.2 (0.0)        | 29.5 (0.4)                                                       | 6.4 (5.2)                   | 47.0 (15.1)                | 1.0 (0.1)        |
| m9             | 37.9 (0.4)                                | 105.6 (0.6)                              | 36.4 (0.3)                  | 46.8 (0.6)                 | 1.3 (0.0)        | 34.6 (1.6)                                                       | 6.2 (3.8)                   | 30.6 (7.6)                 | 0.5 (0.1)        |
| m10            | 36.6 (3.3)                                | 111.9 (3.7)                              | 34.8 (3.3)                  | 37.5 (3.5)                 | 1.1 (0.0)        | 30.7 (4.8)                                                       | 2.1 (5.6)                   | 18.3 (12.3)                | 0.4 (0.1)        |
| <b>Median</b>  | <b>35.8</b>                               | <b>113.3</b>                             | <b>34.5</b>                 | <b>36.0</b>                | <b>1.0</b>       | <b>32.8</b>                                                      | <b>6.3</b>                  | <b>26.0</b>                | <b>0.5</b>       |
| <b>[IQR]</b>   | <b>[34.9-37.1]</b>                        | <b>[107.7-118.3]</b>                     | <b>[33.8-35.5]</b>          | <b>[31.2-45.4]</b>         | <b>[0.9-1.3]</b> | <b>[31.1-33.6]</b>                                               | <b>[3.3-7.1]</b>            | <b>[15.5-30.1]</b>         | <b>[0.2-0.5]</b> |
| <i>Control</i> |                                           |                                          |                             |                            |                  |                                                                  |                             |                            |                  |
| c1             | 42.9 (0.7)                                | 99.3 (2.3)                               | 42.5 (0.7)                  | 54.0 (2.8)                 | 1.3 (0.0)        | 33.4 (3.1)                                                       | 5.0 (2.7)                   | 28.6 (7.4)                 | 0.5 (0.1)        |
| c2             | 39.0 (0.6)                                | 109.8 (0.6)                              | 37.5 (0.8)                  | 38.3 (0.9)                 | 1.0 (0.0)        | 32.2 (2.1)                                                       | 10.0 (2.8)                  | 38.5 (4.7)                 | 0.7 (0.1)        |

|                 |                    |                      |                    |                    |                  |                    |                  |                    |                  |
|-----------------|--------------------|----------------------|--------------------|--------------------|------------------|--------------------|------------------|--------------------|------------------|
| c3              | 40.3 (0.6)         | 109.0 (2.4)          | 38.6 (0.5)         | 41.3 (2.8)         | 1.1 (0.1)        | 32.9 (1.5)         | 2.4 (3.7)        | 30.4 (5.1)         | 0.7 (0.1)        |
| c4              | 37.7 (0.2)         | 103.1 (0.3)          | 37.1 (0.2)         | 47.9 (0.4)         | 1.3 (0.0)        | 35.4 (1.1)         | 1.6 (4.2)        | 18.9 (12.8)        | 0.4 (0.2)        |
| c5              | 36.6 (0.2)         | 117.6 (0.9)          | 34.3 (0.2)         | 35.9 (0.9)         | 1.0 (0.0)        | 31.5 (1.2)         | 8.0 (1.2)        | 48.0 (4.3)         | 1.0 (0.1)        |
| c6              | 37.6 (0.4)         | 113.6 (1.5)          | 36.0 (0.4)         | 40.0 (1.7)         | 1.1 (0.0)        | 32.0 (1.1)         | 0.3 (3.7)        | 24.6 (6.6)         | 0.8 (0.1)        |
| c7              | 36.3 (0.6)         | 109.1 (3.7)          | 34.1 (0.5)         | 44.4 (4.5)         | 1.3 (0.1)        | 31.8 (4.1)         | 2.0 (9.5)        | 15.1 (16.9)        | 0.4 (0.3)        |
| c8              | 36.1 (0.9)         | 114.6 (0.9)          | 31.7 (0.6)         | 38.1 (0.8)         | 1.2 (0.0)        | 35.7 (0.8)         | 3.6 (2.0)        | 15.7 (4.3)         | 0.3 (0.1)        |
| c9              | 35.8 (0.5)         | 115.9 (0.9)          | 32.8 (0.9)         | 37.7 (1.3)         | 1.2 (0.0)        | 34.1 (0.9)         | 8.2 (6.5)        | 29.5 (9.5)         | 0.6 (0.1)        |
| c10             | 34.8 (0.5)         | 119.9 (1.0)          | 31.4 (0.5)         | 23.9 (1.2)         | 0.8 (0.0)        | 27.7 (6.5)         | 0.2 (0.6)        | 14.6 (9.3)         | 0.4 (0.3)        |
| <b>Median</b>   | <b>37.1</b>        | <b>111.7</b>         | <b>35.2</b>        | <b>39.2</b>        | <b>1.1</b>       | <b>32.6</b>        | <b>3.0</b>       | <b>26.6</b>        | <b>0.6</b>       |
| <b>[IQR]</b>    | <b>[36.2-38.6]</b> | <b>[109.0-115.6]</b> | <b>[33.1-37.4]</b> | <b>[37.8-43.6]</b> | <b>[1.1-1.3]</b> | <b>[31.9-33.9]</b> | <b>[1.7-7.2]</b> | <b>[16.5-30.2]</b> | <b>[0.4-0.7]</b> |
| <b><i>p</i></b> | <b>0.07</b>        | <b>0.60</b>          | <b>0.55</b>        | <b>0.41</b>        | <b>0.65</b>      | <b>0.71</b>        | <b>0.45</b>      | <b>0.55</b>        | <b>0.33</b>      |

Baseline mean values (SD) of  $P_{ET}CO_2$ ,  $P_{ET}O_2$ ,  $\Delta PCO_2$ ,  $\Delta PO_2$  and bER for all subjects before the first breath-hold epoch (*left*). The changes (SD) of breath hold duration,  $\Delta PCO_2$ ,  $\Delta PO_2$  and bER from the onset to the end of the breath-hold epoch averaged over six breath-hold epochs (*right*). Medians and interquartile ranges [IQR] were used to summarize RGE metrics in groups. No significant differences was found in the respiratory gas exchange metrics between patients with mTBI and controls ( $p > 0.05$ ) (*bottom row*).
